# Supplementary material for: Effect of networked hybridized nanoparticle reinforcement on the thermal conductivity and mechanical properties of natural rubber composites
Source: Royal Society of Chemistry journal article supplement (doi:10.1039/c8ra08543a), 2019-01-01
Supplement: c8ra08543a1.pdf [file c8ra08543a1.pdf]

## Supplementary Data

### Section-1. Formulations of the composites

Table S1  
Formulations of prepared rubber composites

| Formulation                        | CF/CB<br>(0:0) | CF/CB<br>(40:0) | CF/CB<br>(30:10) | CF/CB<br>(20:20) | CF/CB<br>(10:30) | CF/CB<br>(0:40) | PANI/CB<br>(20:20) | PANI/CB<br>(10:30) |
|------------------------------------|----------------|-----------------|------------------|------------------|------------------|-----------------|--------------------|--------------------|
| RSS III/IV-Vietnam                 | 60.00          | 60.00           | 60.00            | 60.00            | 60.00            | 60.00           | 60.00              | 60.00              |
| BR. Cis 132                        | 40.00          | 40.00           | 40.00            | 40.00            | 40.00            | 40.00           | 40.00              | 40.00              |
| carbon fiber                       | <b>0.00</b>    | <b>40.00</b>    | <b>30.00</b>     | <b>20.00</b>     | <b>10.00</b>     | <b>00.00</b>    | <b>0.00</b>        | <b>0.00</b>        |
| N 375                              | <b>0.00</b>    | <b>0.00</b>     | <b>10.00</b>     | <b>20.00</b>     | <b>30.00</b>     | <b>40.00</b>    | <b>00.00</b>       | <b>00.00</b>       |
| CB/PANI composite                  | <b>0.00</b>    | <b>0.00</b>     | <b>0.00</b>      | <b>0.00</b>      | <b>0.00</b>      | <b>0.00</b>     | <b>40.00</b>       | <b>40.00</b>       |
| Rubber Processing<br>oil (Low PCA) | 8.00           | 8.00            | 8.00             | 8.00             | 8.00             | 8.00            | 8.00               | 8.00               |
| IPPD                               | 2.00           | 2.00            | 2.00             | 2.00             | 2.00             | 2.00            | 2.00               | 2.00               |
| TMQ                                | 1.00           | 1.00            | 1.00             | 1.00             | 1.00             | 1.00            | 1.00               | 1.00               |
| Zinc Oxide 99.5 %                  | 5.00           | 5.00            | 5.00             | 5.00             | 5.00             | 5.00            | 5.00               | 5.00               |
| Stearic Acid                       | 2.50           | 2.50            | 2.50             | 2.50             | 2.50             | 2.50            | 2.50               | 2.50               |
| TBBS                               | 1.00           | 1.00            | 1.00             | 1.00             | 1.00             | 1.00            | 1.00               | 1.00               |
| TMTM                               | 0.30           | 0.30            | 0.30             | 0.30             | 0.30             | 0.30            | 0.30               | 0.30               |
| PVI                                | 0.10           | 0.10            | 0.10             | 0.10             | 0.10             | 0.10            | 0.10               | 0.10               |
| Sulphur                            | 1.60           | 1.60            | 1.60             | 1.60             | 1.60             | 1.60            | 1.60               | 1.60               |
| Total                              | 121.5          | 161.5           | 161.5            | 161.5            | 161.5            | 161.5           | 161.5              | 161.5              |

## Section-2. Chemical properties of natural rubber composites

The FTIR image of vulcanized control (CF/CB (0:0)), PANI/CB (20:20) and CF/CB (20:20) are depicted in Fig. S1. The characteristic peaks of the composites are not shifted significantly due to addition of fillers such as CB, CF and PANI and that can be anticipated the interactions of filler and NR polymer are taken place by means of physical bonding except the chemical interactions.

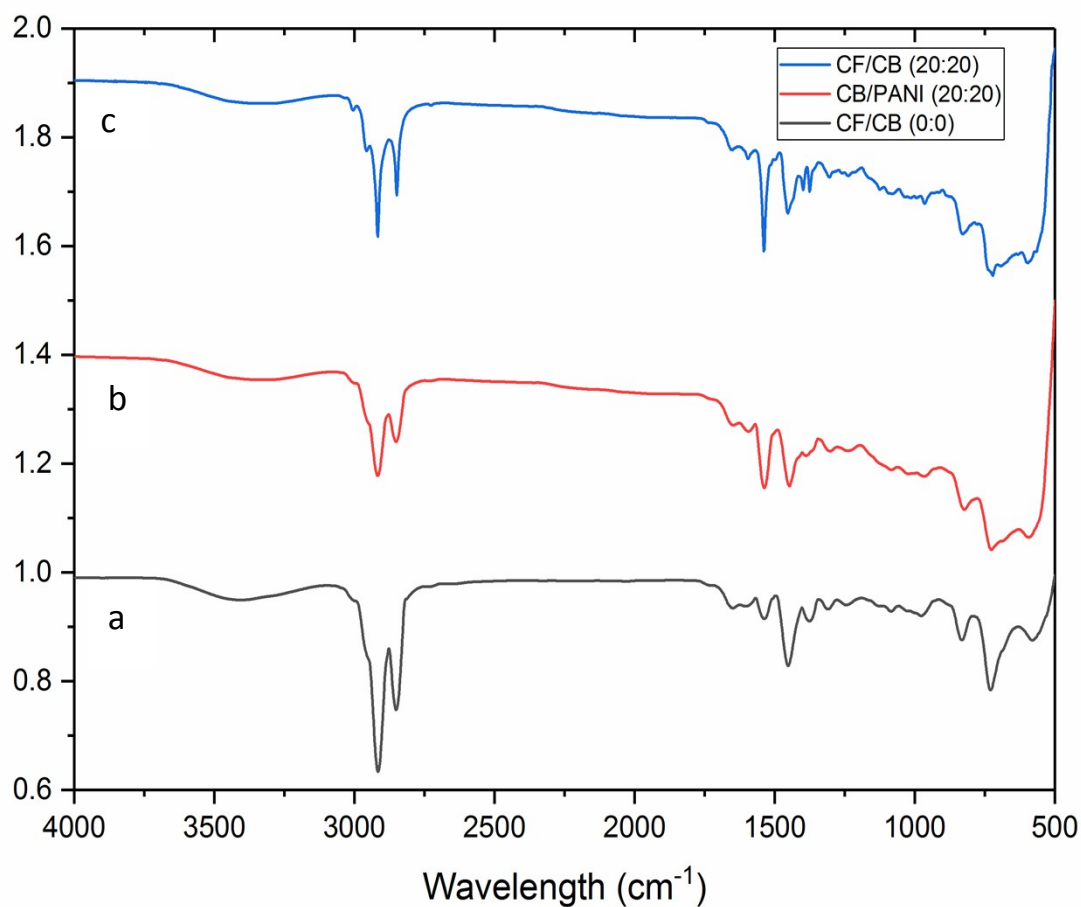

Fig. S1 FTIR images of (a) CF/CB (0:0) (b) PANI/CB (20:20) (c) CF/CB (20:20) prepared final rubber composites.
